# Supplementary material for: Study of structural, electronic and optical properties of tungsten doped bismuth oxychloride by DFT calculations
Source: Royal Society of Chemistry journal article supplement (doi:10.1039/c4cp02801e), 2014-08-26
Supplement: c4cp02801e1.pdf [file c4cp02801e1.pdf]

## *Electronic Supplementary Information*

### **Study of structural, electronic and optical properties of tungsten doped bismuth oxychloride by DFT calculations†**

*Wenjuan Yang<sup>a</sup>, Yanwei Wen<sup>a</sup>, Rong Chen<sup>b</sup>, Dawen Zeng<sup>a\*</sup>, Bin Shan<sup>a,c\*</sup>*

a State Key Laboratory of Material Processing and Die and Mould Technology and School of Materials Science and Technology, Huazhong University of Science and Technology, Wuhan (430074), China

b State Key Laboratory of Digital Manufacturing Equipment and Technology, Huazhong University of Science and Technology, Wuhan (430074), Hubei, China

c Department of Materials Science and Engineering, The University of Texas at Dallas, Richardson, Texas (75080), USA

**Corresponding author:**

[bshan@mail.hust.edu.cn](mailto:bshan@mail.hust.edu.cn) (B. Shan); [dwzeng@mail.hust.edu.cn](mailto:dwzeng@mail.hust.edu.cn) (D. W. Zeng)

SI

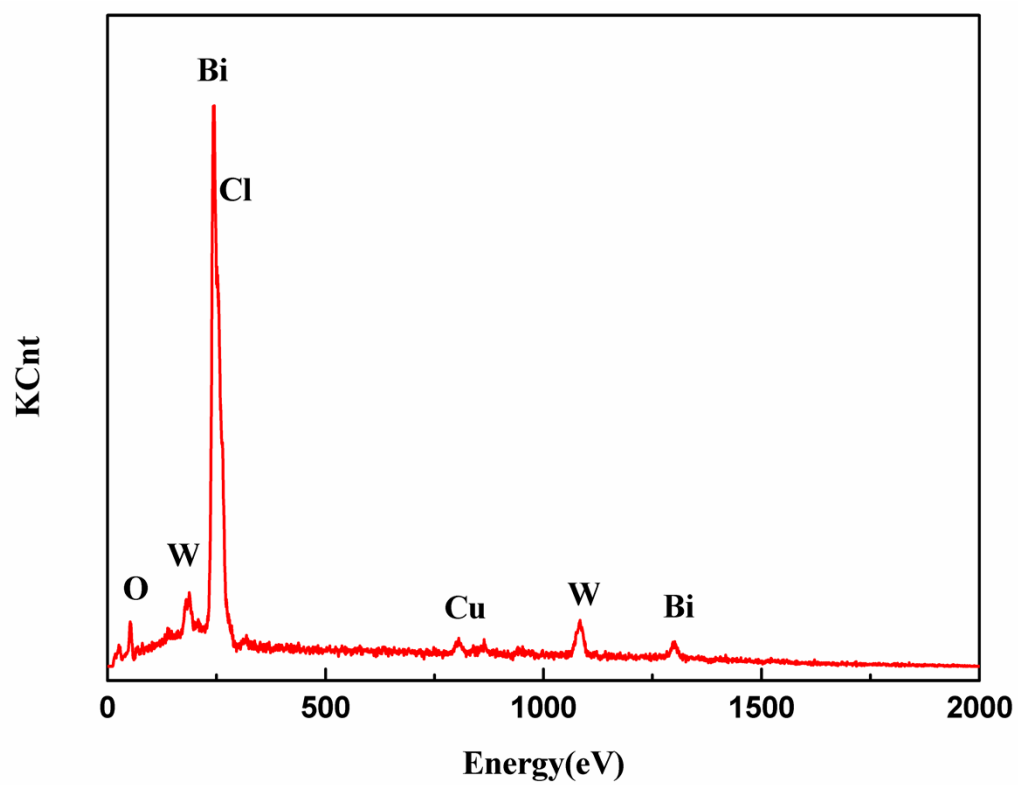

Fig. S1. The EDX of experimentally synthesized tungsten doped BiOCl sample.

SII

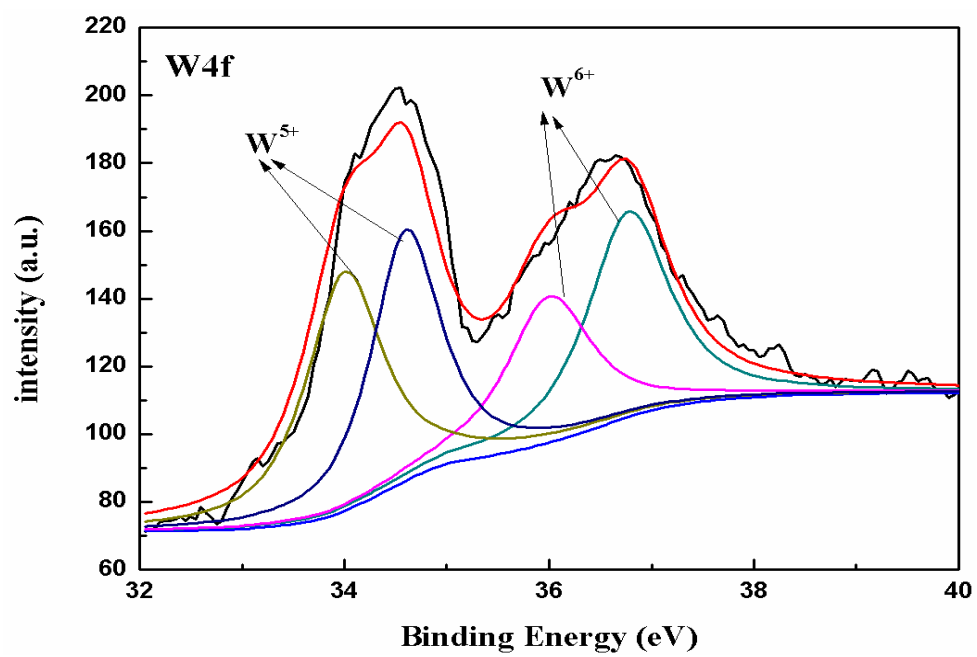

Fig. S2. The XPS of W element in experimentally synthesized tungsten doped BiOCl sample

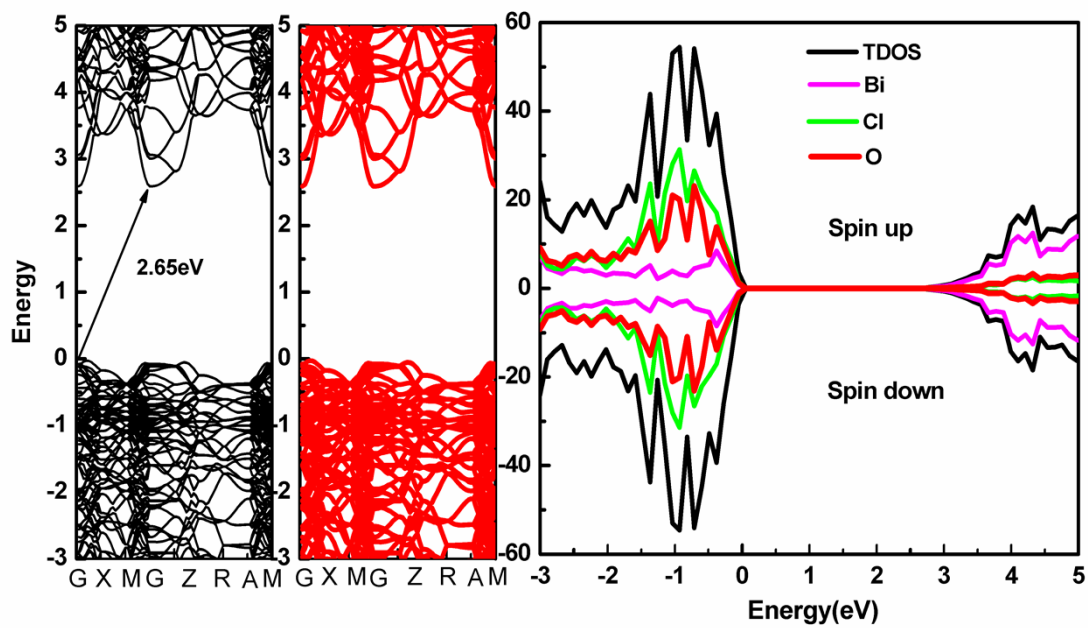

Fig. S3. Band structure (spin up (left) and spin down (middle)) and PDOS (right) for the pure BiOCl using DFT-D2 correction. The fermi energy is set at the energy of zero.
